# Supplementary material
Source: PubMed Central journal article supplement (PMC6865802)

**A****Cell counts for 10x Genomics datasets at various stages of data processing**

| Dataset Description                                                          | Platform                   | Source                         | Number of Cells |                         |                             |                                                   |                                                                 |
|------------------------------------------------------------------------------|----------------------------|--------------------------------|-----------------|-------------------------|-----------------------------|---------------------------------------------------|-----------------------------------------------------------------|
|                                                                              |                            |                                | Total           | BCR contig(s) available | After filtering BCR contigs | After filtering for cells w/ 1 VH and $\geq 1$ VL | After filtering for cells w/ transcriptomic profile of a B cell |
| PBMCs (unsorted) of a healthy donor                                          | V(D)J + 5' Gene Expression | AllCells (Catalog no. PB001)   | 7726            | 1321                    | 1255                        | 1196                                              | 1115                                                            |
| Cells (unsorted) from a squamous non-small cell lung carcinoma (NSCLC) tumor | V(D)J + 5' Gene Expression | A fresh surgical resection     | 7802            | 2953                    | 1817                        | 1530                                              | 1388                                                            |
| CD19+ B cells isolated from PBMCs of a healthy donor                         | Direct Ig Enrichment       | AllCells (Catalog no. PB010-0) | 9465            | 9465                    | 9219                        | 8454                                              | -                                                               |
| B-lymphoblastoid cell line GM12878                                           | Direct Ig Enrichment       | Coriell (Catalog no. GM12878)  | 854             | 854                     | 819                         | 799                                               | -                                                               |

**B****Cell counts for Croote et al. 2018 dataset**

| Subject | Number of B cells         |                             |                                                   |
|---------|---------------------------|-----------------------------|---------------------------------------------------|
|         | As in Croote et al., 2018 | After filtering BCR contigs | After filtering for cells w/ 1 VH and $\geq 1$ VL |
| PA11    | 59                        | 59                          | 59                                                |
| PA12    | 267                       | 265                         | 265                                               |
| PA13    | 202                       | 200                         | 200                                               |
| PA14    | 212                       | 211                         | 211                                               |
| PA15    | 110                       | 110                         | 110                                               |
| PA16    | 123                       | 123                         | 123                                               |
| Total   | 971                       | 968                         | 968                                               |

**Supplemental Figure 1. A.** Summary of datasets from 10x Genomics. **B.** Summary of B cells from food-allergic individuals. **C.** Distance-to-nearest neighbor plot to guide choosing a fixed distance threshold for inferring clones via hierarchical clustering. Cells were first partitioned into groups sharing the same IGHV gene, IGHJ gene, and heavy chain junction length. Within each partition, for each heavy chain junction sequence, the smallest non-zero nucleotide Hamming distance to other heavy chain junction sequences in the same partition was calculated. A threshold, indicated by a dashed line, was chosen via manual inspection to separate the bimodal distribution representing cells that were likely to be clonally related from unrelated ones.

**C**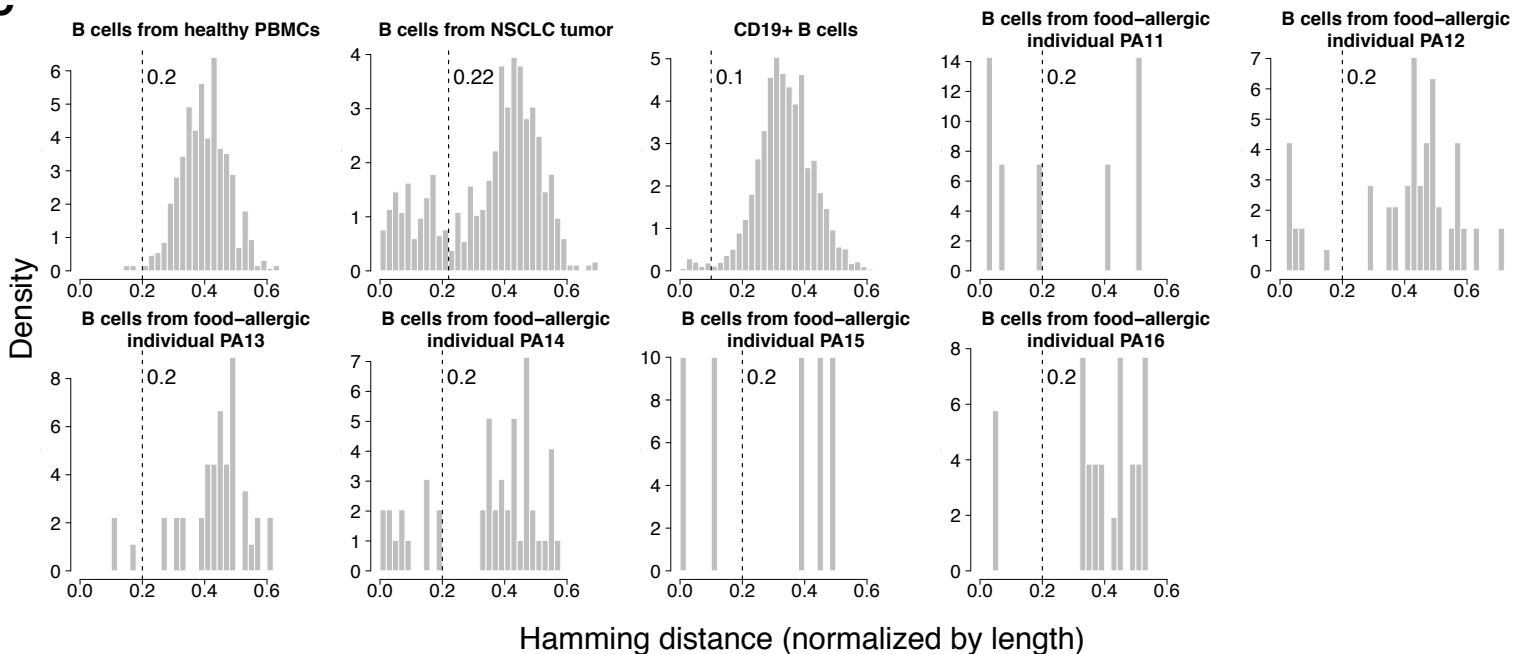

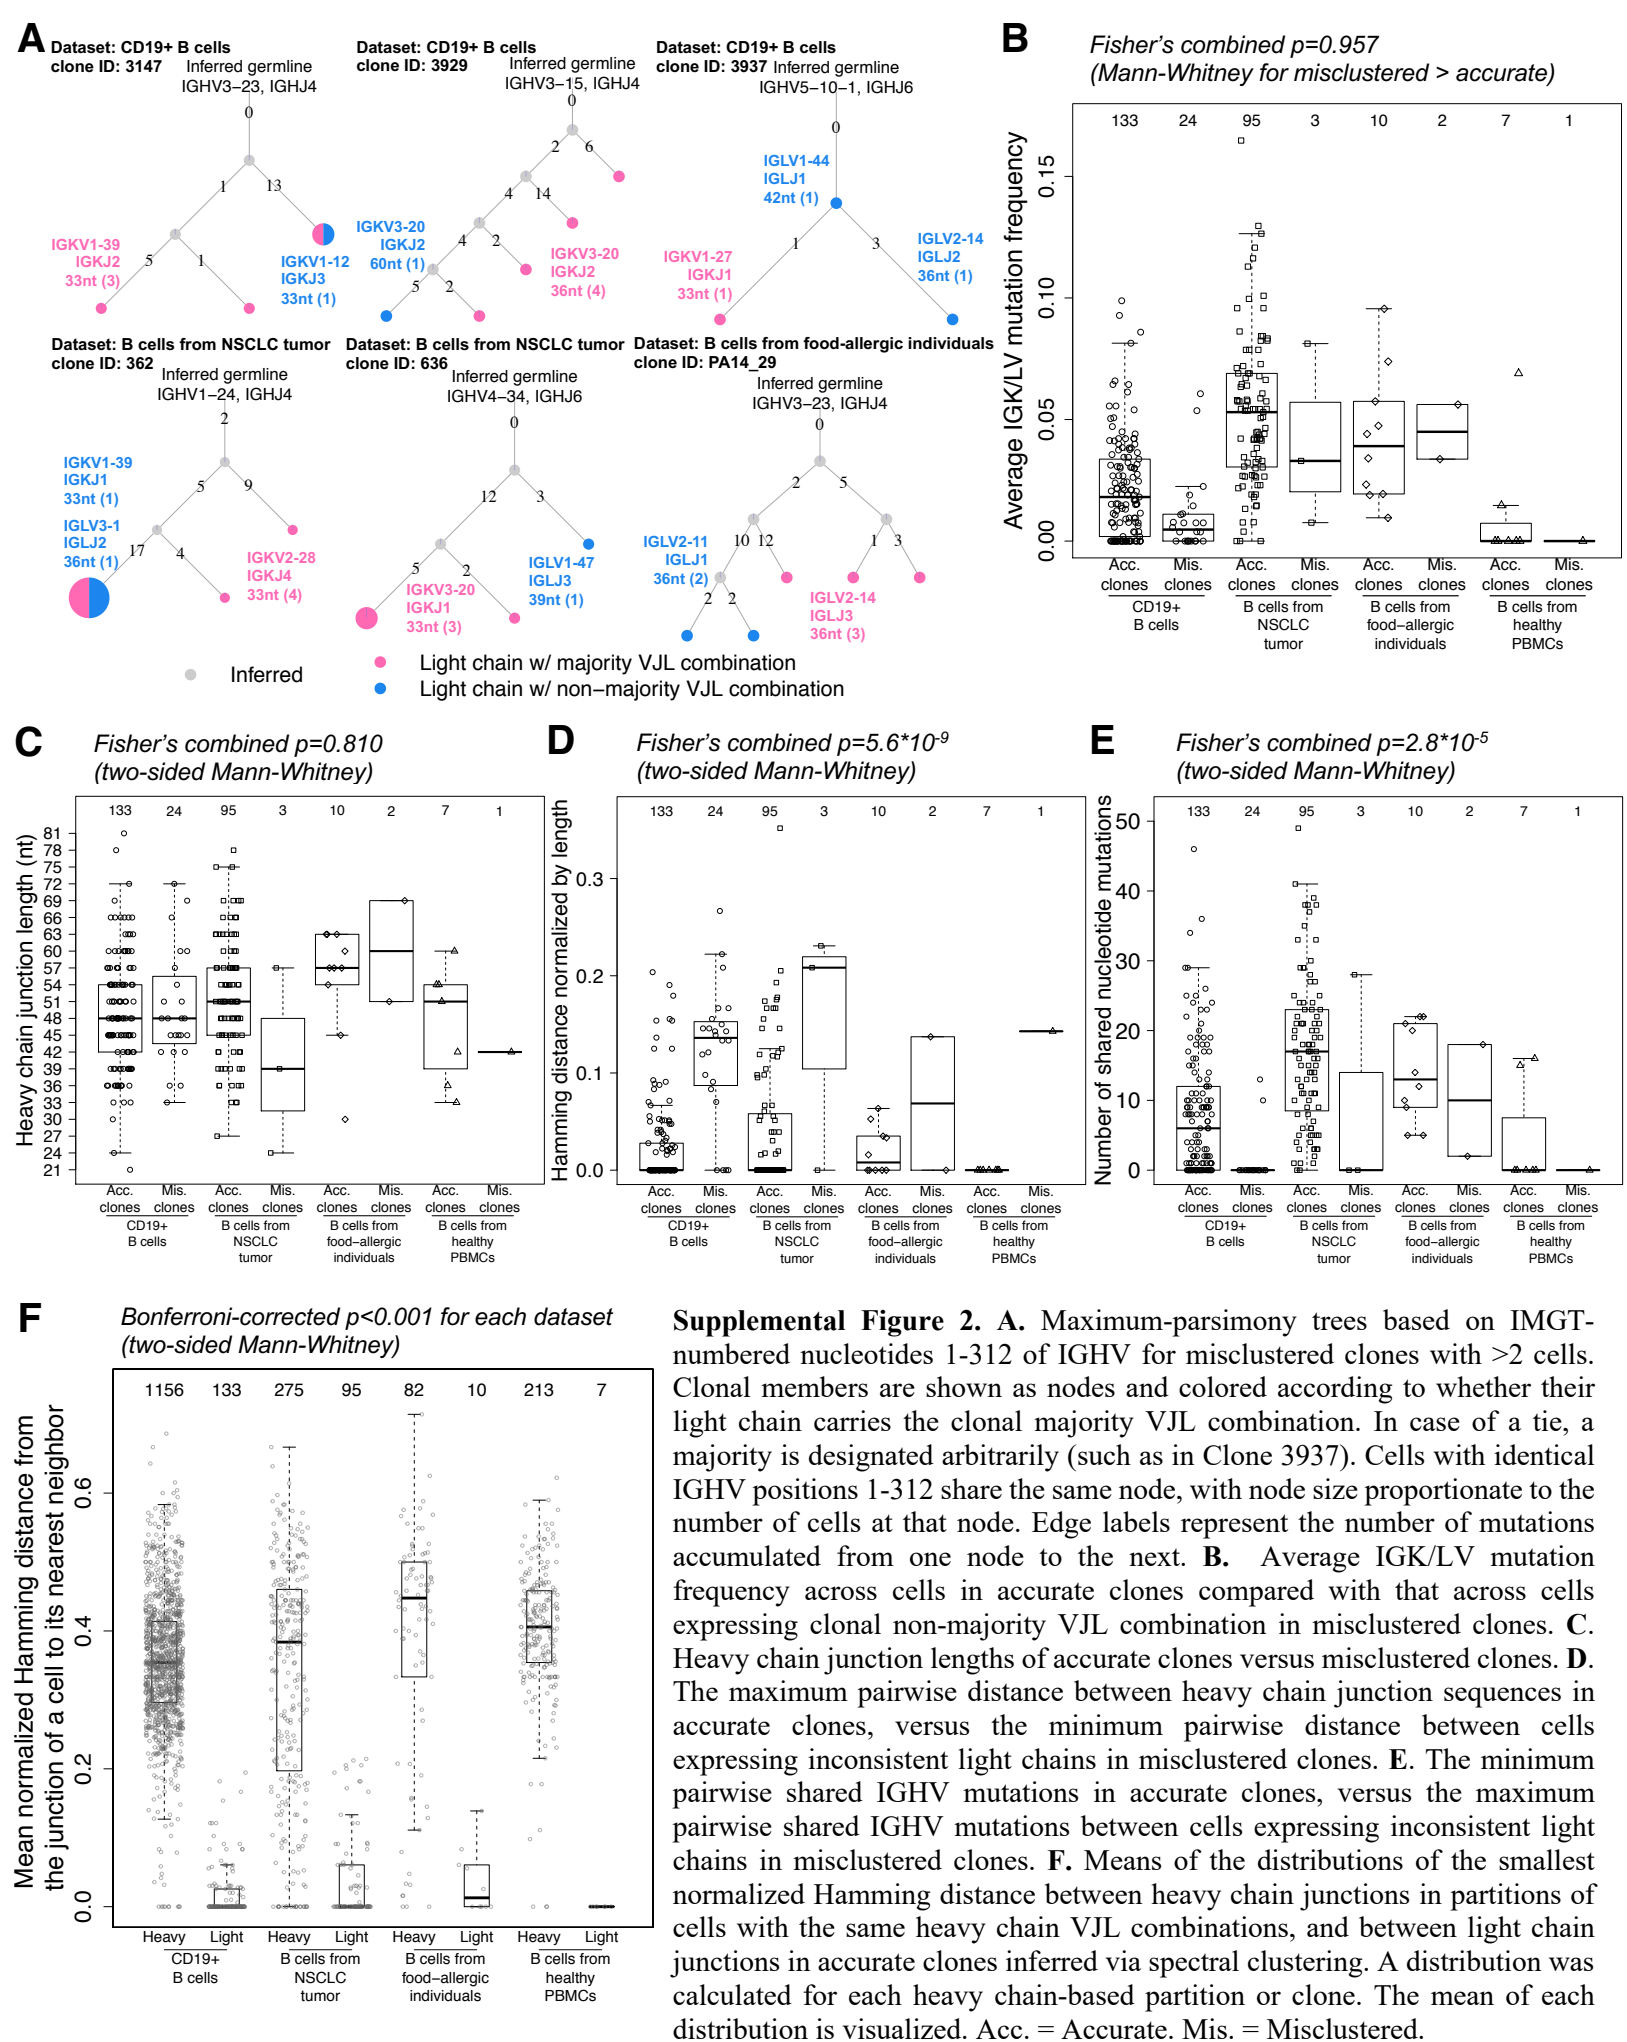

Supplement: NIHMS1536993-supplement-1.pdf [file NIHMS1536993-supplement-1.pdf]
